# Supplementary material
Source: HighWire-hosted journal article supplement (https://bmjopen.bmj.com/content/6/4/e008985)
Supplement: inline-supplementary-material-1 [file inline-supplementary-material-1.pdf]

## APPENDIX

**Appendix-Figure 1. Educational level trends over time, Colombia, 1998-2012**

*The thicker markers are those from the year with real data available (source: Colombian Demography Health Surveys in 1995, 2000, 2005 and 2010). The points in between were interpolated (see methods)*

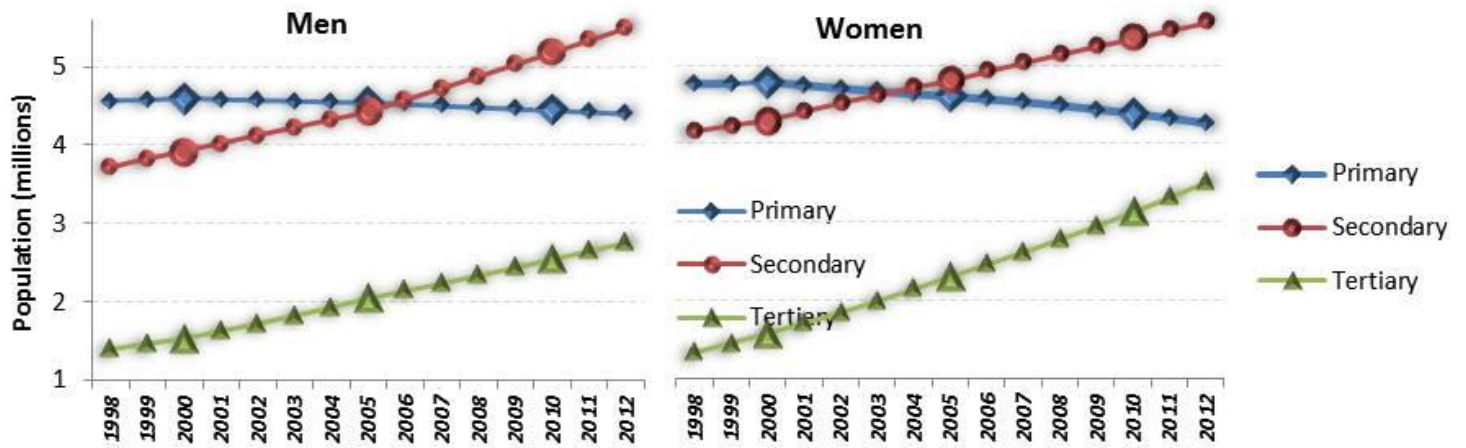

**Appendix-Table 1. Classification of Causes of death, International Classification of Diseases (ICD-10) codes for non-communicable diseases**

| Non-Communicable Diseases                 |                                                                      | ICD-10 codes |
|-------------------------------------------|----------------------------------------------------------------------|--------------|
| Cardiovascular diseases                   |                                                                      | I00-I99      |
| Malignant neoplasm                        |                                                                      | C00-D48      |
| Diabetes mellitus                         |                                                                      | E10-E14      |
| Chronic lower respiratory diseases (CLRD) |                                                                      | J40-J47      |
| Other Non-Communicable Diseases           | Mental and behavioural disorders                                     | F00–F99      |
|                                           | Diseases of the nervous system                                       | G00–G99      |
|                                           | Diseases of the digestive system                                     | K00–K93      |
|                                           | Diseases of the genitourinary system                                 | N00–N99      |
|                                           | Congenital malformations, deformations and chromosomal abnormalities | Q00–Q99      |

**Appendix-Figure 2: Sex-specific Relative Index of Inequality (RII) trends including APC based on joinpoint models**

*Markers: Annual observed cancer mortality RII. Lines: modelled RII trends. Estimates are results from 5 databases generated by multiple imputations, appropriately reflecting uncertainty attributable to missing values.*

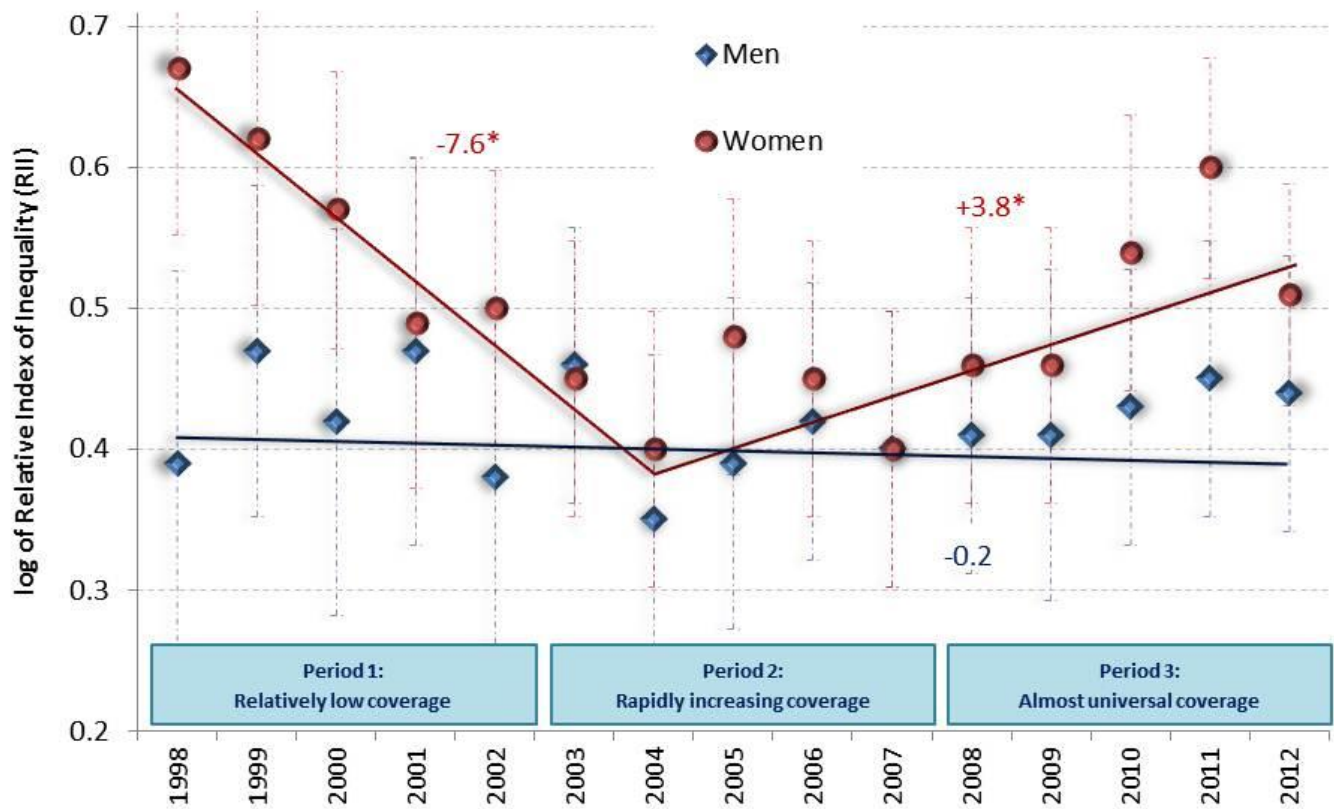

**Appendix-Table 2. Rate ratio in premature cancer mortality by educational level by 5-years periods and separately for men and women at 20–64 years, Colombia 1998-2012**

|              |                | Period 1 (1998-2002):<br>Relatively low coverage | Period 2 (2003-2007):<br>Rapidly increasing coverage | Period 3 (2008-2012):<br>Almost universal coverage |
|--------------|----------------|--------------------------------------------------|------------------------------------------------------|----------------------------------------------------|
| <b>MEN</b>   | Tertiary (Ref) | 1.00                                             |                                                      |                                                    |
|              | Secondary      | 1.08 ( 0.89 , 1.30 )                             | <b>1.19 ( 1.14 , 1.24 )</b>                          | <b>1.31 ( 1.14 , 1.52 )</b>                        |
|              | Primary        | <b>1.32 ( 1.11 , 1.56 )</b>                      | <b>1.37 ( 1.31 , 1.43 )</b>                          | <b>1.42 ( 1.23 , 1.63 )</b>                        |
|              | Year           | 1.01 ( 0.98 , 1.04 )                             | 0.99 ( 0.96 , 1.02 )                                 | 1.02 ( 1.00 , 1.04 )                               |
|              | Secondary*Year | 1.00 ( 0.96 , 1.03 )                             | 1.00 ( 0.97 , 1.04 )                                 | <b>0.96 ( 0.94 , 0.99 )</b>                        |
|              | Primary*Year   | 1.00 ( 0.96 , 1.03 )                             | 1.00 ( 0.97 , 1.03 )                                 | 0.99 ( 0.96 , 1.02 )                               |
|              |                |                                                  |                                                      |                                                    |
| <b>WOMEN</b> | Tertiary (Ref) | 1.00                                             |                                                      |                                                    |
|              | Secondary      | 1.10 ( 0.91 , 1.33 )                             | <b>1.27 ( 1.22 , 1.32 )</b>                          | <b>1.29 ( 1.13 , 1.47 )</b>                        |
|              | Primary        | <b>1.25 ( 1.04 , 1.51 )</b>                      | <b>1.44 ( 1.39 , 1.50 )</b>                          | <b>1.45 ( 1.28 , 1.65 )</b>                        |
|              | Year           | 1.03 ( 1.00 , 1.07 )                             | 0.98 ( 0.96 , 1.01 )                                 | 1.00 ( 0.98 , 1.02 )                               |
|              | Secondary*Year | 0.99 ( 0.96 , 1.03 )                             | 1.01 ( 0.98 , 1.04 )                                 | 0.99 ( 0.97 , 1.02 )                               |
|              | Primary*Year   | 0.97 ( 0.94 , 1.01 )                             | 1.00 ( 0.97 , 1.02 )                                 | 1.01 ( 0.98 , 1.03 )                               |
|              |                |                                                  |                                                      |                                                    |
